# Supplementary material
Source: bioRxiv or medRxiv preprint supplement (https://medrxiv.org/highwire/filestream/96555/field_highwire_adjunct_files/0/2020.09.11.20191940-1.pdf)
Supplement: Supplementary file [file 2020.09.11.20191940-1.pdf]

## **Shedding of infectious SARS-CoV-2 from airways in hospitalized COVID-19 patients in relation to serum antibody responses**

**Authors:** Hedvig Glans\*<sup>1,2</sup>, Sara Gredmark-Russ<sup>1,3</sup>, Mikaela Olausson<sup>4</sup>, Sara Falck-Jones<sup>5</sup>, Renata Varnaite<sup>3</sup>, Wanda Christ<sup>3</sup>, Kimia T. Maleki<sup>3,4</sup>, Maria Lind Karlberg<sup>4</sup>, Sandra Broddesson<sup>4</sup>, Ryan Falck-Jones<sup>6, 7</sup>, Max Bell<sup>6, 7</sup>, Niclas Johansson<sup>1,2</sup>, Anna Färnert<sup>1,2</sup>, Anna Smed-Sörensen<sup>5</sup>, Jonas Klingström<sup>3,4</sup>, Andreas Bråve<sup>4</sup>

### **Affiliations**

1. Department of Infectious Diseases, Karolinska University Hospital, Stockholm, Sweden.
2. Department of Medicine Solna, Karolinska Institutet, Stockholm, Sweden.
3. Center for Infectious Medicine, Department of Medicine Huddinge, Karolinska Institutet, Stockholm, Sweden.
4. Department of Microbiology, Public Health Agency of Sweden, Solna, Sweden.
5. Division of Immunology and Allergy, Department of Medicine Solna, Karolinska Institutet, Stockholm, Sweden
6. Department of Perioperative Medicine and Intensive Care, Karolinska University Hospital, Stockholm, Sweden
7. Department of Physiology and Pharmacology, Karolinska Institutet, Stockholm, Sweden.

**Corresponding author:** Hedvig Glans, [hedvig.glans@ki.se](mailto:hedvig.glans@ki.se), phone number +46724698808,

**Supplementary Table 1.** Detection of SARS-CoV-2 and specific antibody levels in all COVID-19 patients (n=36).

| Patient ID | Neutralizing antibody titers | Anti-SARS-CoV-2 IgG titers | NPH culture CPE (Ct value) | Sputum culture CPE (Ct value) | Ct value NPH PCR | Ct value sputum PCR | Ct value serum PCR | Days of symptoms | Days since first positive SARS-CoV-2 PCR |
|------------|------------------------------|----------------------------|----------------------------|-------------------------------|------------------|---------------------|--------------------|------------------|------------------------------------------|
| 1          | <10                          | <20                        | 14                         | 7                             | 19               | 21                  | neg                | 16               | 9                                        |
| 2          | <10                          | <20                        | 12                         | neg                           | 24               | 28                  | neg                | 9                | 5                                        |
| 3          | <10                          | 40                         | 8                          | neg                           | 25               | 19                  | neg                | 9                | 2                                        |
| 4          | 10                           | 40                         | 8                          | neg                           | 26               | 20                  | neg                | 11               | 4                                        |
| 5          | 10                           | 40                         | neg                        | neg                           | 32               | 24                  | neg                | 9                | 1                                        |
| 6          | 10                           | 40                         | neg                        | neg                           | neg              | 23                  | neg                | 10               | 3                                        |
| 7          | 10                           | 320                        | neg                        | n/a                           | 33               | n/a                 | neg                | 9                | 2                                        |
| 8          | 12                           | 2560                       | neg                        | neg                           | neg              | neg                 | neg                | 18               | 6                                        |
| 9          | 15                           | 160                        | neg                        | neg                           | 28               | 37                  | 38                 | 10               | 1                                        |
| 10         | 30                           | 320                        | neg                        | n/a                           | neg              | n/a                 | neg                | 11               | 7                                        |
| 11         | 30                           | 640                        | neg                        | neg                           | neg              | neg                 | neg                | 12               | 5                                        |
| 12         | 40                           | 40                         | neg                        | n/a                           | neg              | n/a                 | neg                | 10               | 2                                        |
| 13         | 40                           | 1280                       | neg                        | n/a                           | 33               | n/a                 | neg                | 11               | 3                                        |
| 14         | 40                           | 1280                       | neg                        | pos <sup>†</sup>              | 34               | 32                  | neg                | 20               | 9                                        |
| 15         | 60                           | 640                        | neg                        | neg                           | 28               | n/a                 | neg                | 14               | 9                                        |
| 16         | 60                           | 640                        | neg                        | neg                           | neg              | 31                  | neg                | 18               | 4                                        |
| 17         | 60                           | 1280                       | neg                        | neg                           | 35               | neg                 | neg                | 15               | 9                                        |
| 18         | 60                           | 1280                       | neg                        | neg                           | 35               | neg                 | 36                 | 48               | 27                                       |
| 19         | 60                           | 2560                       | neg                        | neg                           | 30               | 29                  | neg                | 28               | 17                                       |
| 20         | 60                           | 2560                       | neg                        | pos*                          | neg              | neg                 | neg                | 30               | 16                                       |
| 21         | 80                           | 640                        | neg                        | neg                           | neg              | 36                  | neg                | 53               | 44                                       |
| 22         | 80                           | 1280                       | neg                        | neg                           | neg              | 34                  | neg                | 43               | 9                                        |
| 23         | 80                           | 2560                       | neg                        | neg                           | 38               | neg                 | 38                 | 18               | 6                                        |
| 24         | 120                          | 320                        | neg                        | neg                           | 26               | 20                  | neg                | 9                | 5                                        |
| 25         | 120                          | 2560                       | neg                        | neg                           | neg              | 36                  | neg                | 39               | 25                                       |
| 26         | 120                          | 2560                       | neg                        | neg                           | neg              | neg                 | neg                | 21               | 14                                       |
| 27         | 160                          | 1280                       | neg                        | neg                           | neg              | neg                 | neg                | 21               | 15                                       |
| 28         | 160                          | 1280                       | neg                        | neg                           | neg              | 27                  | neg                | 43               | 36                                       |
| 29         | 240                          | 1280                       | neg                        | n/a                           | neg              | neg                 | neg                | 21               | 16                                       |
| 30         | 240                          | 1280                       | neg                        | neg                           | neg              | 28                  | neg                | 14               | 7                                        |
| 31         | 240                          | 1280                       | neg                        | pos*                          | neg              | 28                  | neg                | 27               | 17                                       |
| 32         | 240                          | 2560                       | neg                        | neg                           | neg              | neg                 | neg                | 20               | 7                                        |
| 33         | 240                          | 2560                       | neg                        | neg                           | neg              | neg                 | neg                | 37               | 27                                       |
| 34         | 320                          | 1280                       | neg                        | n/a                           | neg              | n/a                 | neg                | 22               | 15                                       |
| 35         | 320                          | 2560                       | neg                        | neg                           | neg              | 32                  | neg                | 19               | 8                                        |
| 36         | 560                          | 1280                       | neg                        | neg                           | neg              | neg                 | neg                | 26               | 12                                       |

\*Positive for herpes simplex 1 PCR.

<sup>†</sup>Negative for SARS-CoV-2, herpes simplex 1 and 2, cytomegalovirus, adenovirus, bocavirus, enterovirus, metapneumovirus, parainfluenzavirus and rhinovirus.

Abbreviation: neg – negative, NPH – nasopharynx, pos – positive
